# Supplementary material
Source: Springer Nature journal article supplement (https://www.springermedizin.de/resource/supplementary/13012_2011_466_MOESM4_ESM.pdf/9630032)
Supplement: MOESM4 [file 9630032]

## Intermediate outcomes

## End outcomes

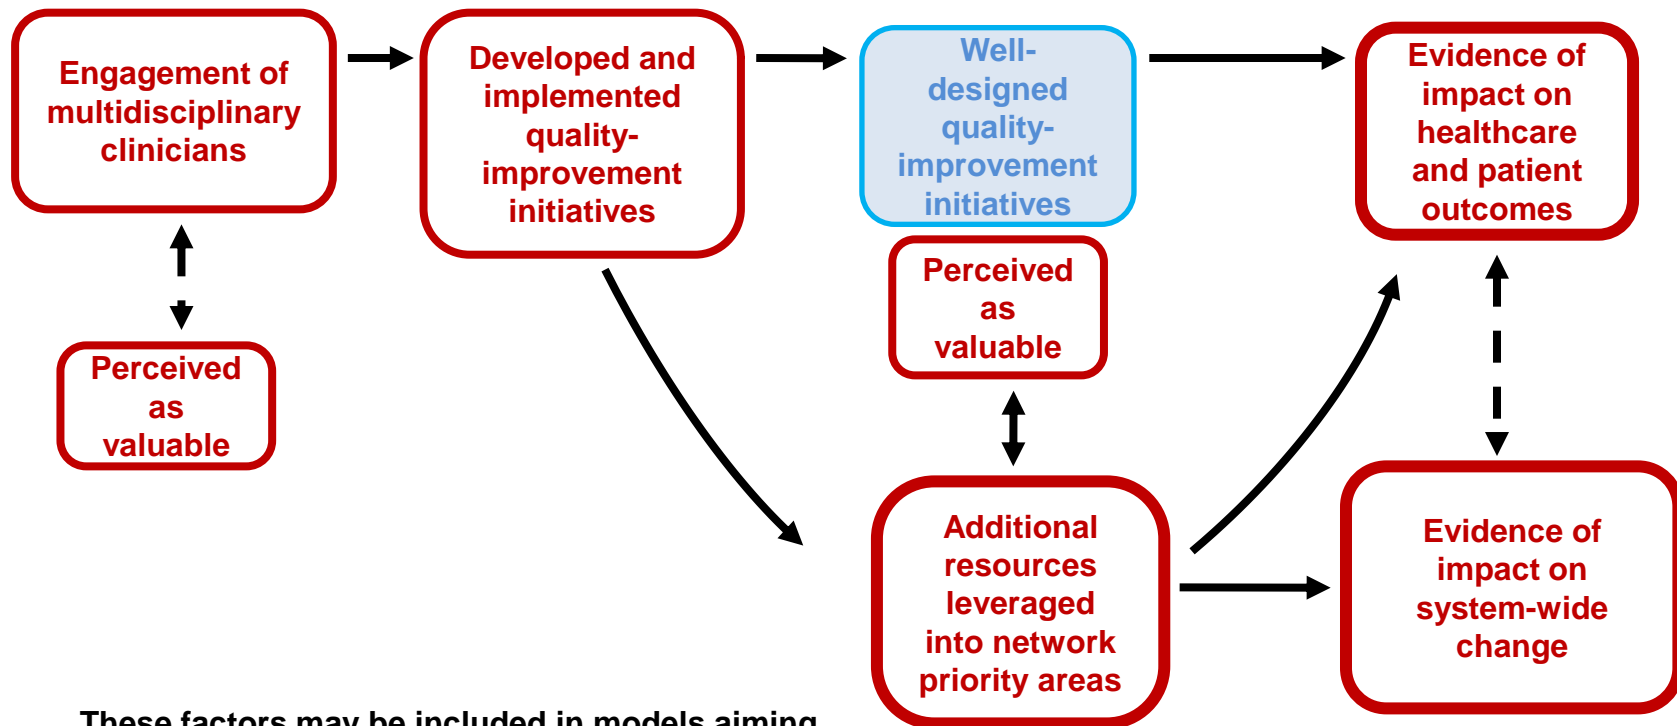

These factors may be included in models aiming to explain the mechanisms linking the outcomes of successful networks.

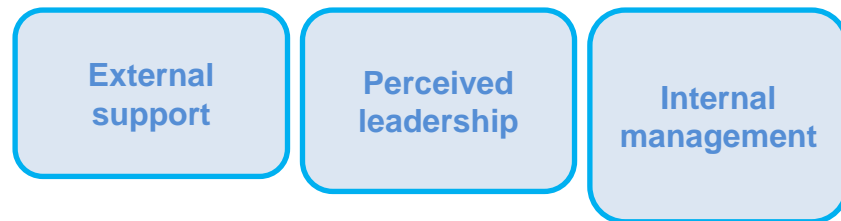

Shaded blue boxes= Explanatory factors

Unshaded red boxes= Outcome factors
